# Supplementary material
Source: Springer Nature journal article supplement (https://www.springermedizin.de/resource/supplementary/13098_2010_105_MOESM3_ESM.pdf/9670570)

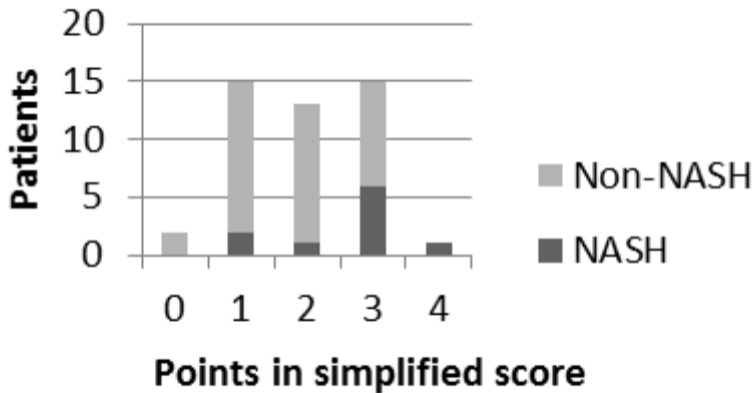

Supplement: MOESM3 [file 9670570]
